# Supplementary material
Source: PubMed Central journal article supplement (PMC2254983)
Supplement: JCI0833942sd.pdf [file JCI0833942sd.pdf]

### **Supplementary experimental procedures:**

*Quantitative RT-PCR:* EBs were harvested every 24 hours during differentiation for total RNA isolation. 2mg of total RNA was reverse transcribed using random decamers, and MMLVRT. Relative RNA expression levels were measured using quantitative RT-PCR. Detection of CPC markers was achieved with FAM/ MGB probes (Applied Biosystems): *Nkx2-5* (cat.# Mm00657783\_m1), *Tbx5* (cat.# Mm00803521\_m1), *Myh6* (Mm00440354\_m1), *Tnnt2* (Mm00441922\_m1), *Brachyury* (Mm00436877\_m1). The instrument used was the Applied Biosystems ABIPrism 7900HT sequence detection system and the software for data collection and analysis was the SDS2.1. An *18S* RNA probe (Hs99999901\_s1) was used in order to normalize the data.

*Immunocytochemistry:* EBs were harvested at the various indicated timepoints, washed with PBS, and fixed with 4% paraformaldehyde in PBS (overnight at 4°C). The EBs were then dehydrated in 30% sucrose/ PBS (overnight at 4°C) and cryopreserved in O.C.T compound (Sakura, cat.# 4583). The frozen EBs were sectioned and the sections were placed on glass slides for the staining. All solutions used contained 1% donkey serum, and Triton X-100. Primary antibodies used were: mouse anti-Actn1 (Sigma, cat.# EA53, 1:400), mouse anti-Tnni3 (US Biological, cat.# T8665-13F, 1:400), goat anti-Nkx2-5 (Santa Cruz, cat.# sc8697, 1:200), goat anti-Gata5 (R&D, cat.# AF2170, 1:200), goat anti-Bmp2/4 (R&D, cat.# AF355, 1:200), goat anti-Myocardin (Santa Cruz, cat.# sc21559, 1:200), mouse anti-GFP (Molecular Probes, cat.# A11120, 1:400), mouse anti-Ki-67 (Zymed, cat.# 18-0192Z, 1:200), mouse anti-Pcna (Santa Cruz, sc56, 1:200), mouse anti-Cd31 (Abcam, cat# 24590, 1:100), rabbit anti-Von Willebrand factor (Abcam, cat# ab6994, 1:100), rabbit anti-Acta2 (Abcam, cat# ab5694, 1:100). The secondary antibodies used were: donkey anti-mouse Alexa 594 (Molecular Probes, cat.#

A21203, 1:500), donkey anti-goat Alexa 488 (Molecular Probes, cat.# 21202, 1:500), donkey anti-goat Alexa 594 (Molecular Probes, cat.# A11058, 1:500), donkey anti-rabbit Alexa 488 or 594 (Molecular probes, 1:500). F-Actin was detected with the toxin phalloidin which is FITC conjugated (Sigma, P5282, 1:50). Nuclei were detected with DAPI, 4',6-diamidino-2-phenylindole, dilactate (Sigma, cat.# D8417). Antibodies were fluorescently conjugated using either the Zenon mouse IgG labeling kit (Molecular probes, cat.# Z25002), or the Zenon rabbit IgG labeling kit (Molecular probes, cat.# Z25302).

Sorted cells were cultured in suspension for 48 hours and then transferred in a tissue culture dish for another 48 hours. At that point the cells were fixed with 4% paraformaldehyde (1 hour, 25°C) and permeabilized with Triton X-100. The same reagents as above were used for staining.

Images were taken using a Nikon Eclipse E800 upright microscope or a Nikon Eclipse TE200 inverted microscope. The digital cameras used were a Photometrics Coolsnap HQ or a Micromax RTE/CCD-1300-Y/HS. The software used was Metamorph 6.2r2 and Adobe Photoshop 7.0.

*Semiquantitative RT-PCR:* RNA was isolated from FACS sorted cells (GFP<sup>+</sup> and GFP<sup>-</sup> cell populations) between days 5 and 8 of differentiation. 1mg of RNA was reverse transcribed using Superscript III first strand, and the PCR products were amplified using Taq DNA polymerase. A low cycle PCR amplification was used in order to ensure that the signal intensity would stay in the linear range. A Biorad Chemi-Doc XRS was used to visualize the bands on the agarose gels. The intensity level of each band was measured and normalized to that of *Gapdh*. Each PCR reaction was repeated four times in order to ensure a significant result. Genes examined were identified to be uniquely upregulated or downregulated in CPC population during

all four time points of differentiation that were analyzed: *Nkx2-5* (NM\_008700), *Myocd* (NM\_145136), *Sox18* (NM\_009236), *Myl4* (NM\_001858), *Myl7* (NM\_022879), *Tnnc1* (NM\_009393), *Tnnt2* (NM\_011619), *Cd34* (NM\_133654), *Tfpi* (NM\_011576), *Kdr* (NM\_010612), *Tek* (NM\_013690), *Esam* (NM\_027102), *T* (NM\_009309), *Pou5f1* (NM\_013633), *Sox17* (NM\_011441).

## **Supplementary figure and movie legends:**

### **Supplementary figure 1: Culture and differentiation of mouse embryonic stem cells.**

(A) Mouse embryonic stem cells are cultured and maintained undifferentiated on a layer of mitotically inactivated primary mouse embryonic fibroblasts in the presence of leukemia inhibitory factor.

(B) Colonies of mESCs on a layer of mouse primary embryonic fibroblasts. Bar 500µm.

(C) Colonies of mESCs after undergoing a feeder layer subtraction step and cultured on gelatin treated plastic.

(D-J) Differentiation of mESCs through embryoid body formation. (Days 1, 2, 3, 4, 5, 6, 8 respectively).

### **Supplementary figure 2: Cardiac differentiation of mESCs.**

Embryoid bodies isolated and stained on differentiation day 21 for cardiac markers Nkx2-5 (A-B), Actn1 (C-D), and Tnni3 (E-F). Scale bar represents 50µm.

### **Supplementary figure 3: CPC culture of cardiac fibroblasts.**

Differentiation day 6 FAC sorted mESC-derived GFP<sup>+</sup> CPCs were plated on mitotically inactivated primary neonatal cardiac fibroblasts isolated from rat neonates. Cells were plated either in serum free conditions (DMEM/F12, N2, B27) or in 10% fetal bovine serum (DMEM) for 2 weeks. Scale bar represents 100µm.

### **Supplementary figure 4: Microarray expression analysis of cardiac progenitor cells.**

The molecular expression profile of mESC-derived CPCs was examined using microarray expression analysis. EBs were dissociated and FAC sorted between days 5 and 8 of differentiation. RNA was extracted from CPCs (GFP<sup>+</sup> cells) and GFP<sup>-</sup> cells. Biotinylated cRNA was hybridized on the Affymetrix murine 430 2.0 array following the two-cycle target labeling sample preparation procedure. Genes with expression levels that are uniquely upregulated or down-regulated 1.5 times in the CPC population when compared to the rest of the cells present in the differentiating embryoid bodies between days 5 and 8 of differentiation.

**Supplementary figure 5: Semi-quantitative RT-PCR analysis.**

The relative expression levels of genes that were identified to be upregulated or down-regulated uniquely in the CPC population using microarray analysis were further analyzed using semi quantitative RT-PCR analysis. Expression values for each gene were normalized to that of *Gapdh*. Student's t-test was used to calculate whether there was a significant difference between the expression levels of a particular gene in the CPC population and the rest of the cells in the embryoid bodies at the designated time points; \*\*,  $p \leq 0.01$ .

### **Supplementary figure 6: *in situ* hybridization**

Whole mount *in situ* hybridization analysis for genes identified by microarray expression analysis to be upregulated in the mESC-derived CPCs. Hybridization was done on mouse embryos isolated on embryonic days 7.5, 8.5, and 9.5. Genes analyzed are: *BC054438*, *Dpp4*, and 3110004L20Rik. Black arrowheads indicate the cardiac crescent; H, heart; OFT, outflow tract; UA, umbilical artery.

### **Supplementary movie 1. Spontaneously contracting cardiac areas in a culture of differentiating mESCs.**

MESCs were differentiated using the hanging droplet technique. The resulting EBs were plated on day 6 of differentiation. The contracting cardiac area shown in this movie was recorded on day 10 of differentiation.

### **Supplementary movie 2. Spontaneously contracting cardiac areas in a culture of differentiating mESCs express GFP under the control of the *Nkx2-5* enhancer.**

### **Supplementary movie 3. Spontaneously contracting cardiac areas in a culture of differentiating mESCs express GFP under the control of the *Nkx2-5* enhancer.**

### **Supplementary movie 4. FAC sorted GFP<sup>+</sup> cells continue to express the transgene while spontaneously contracting.**

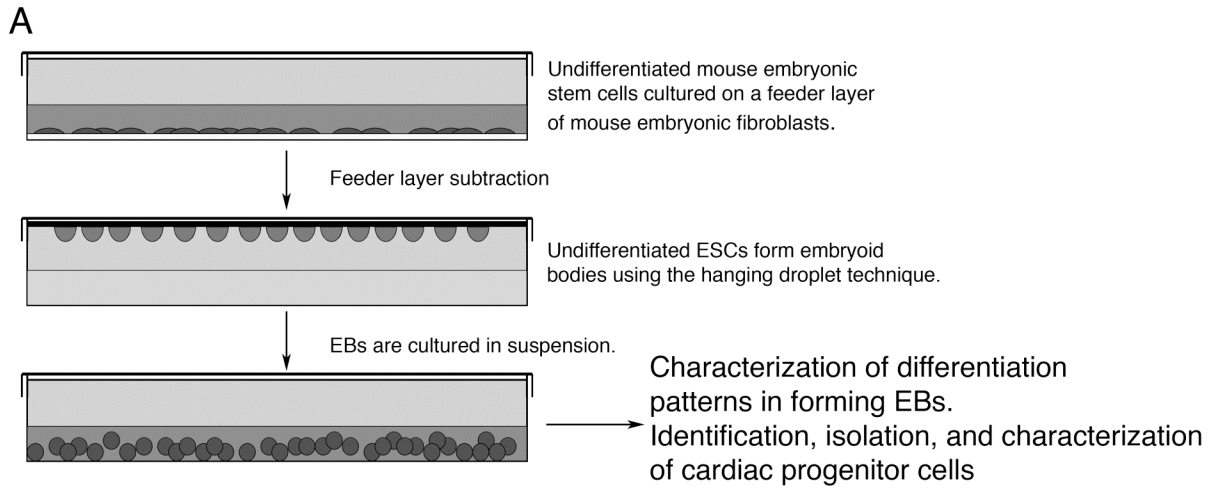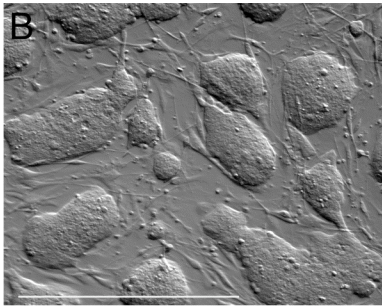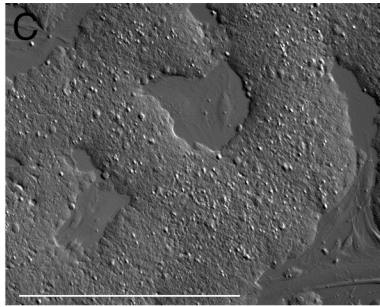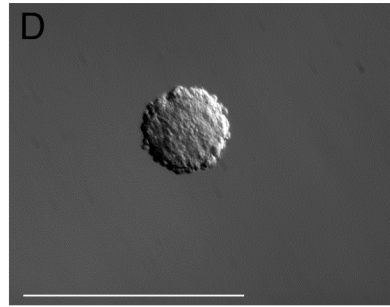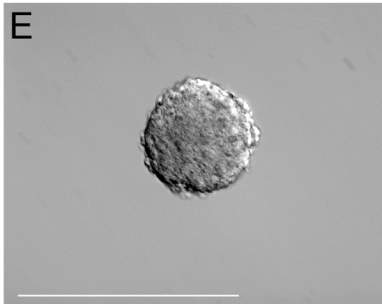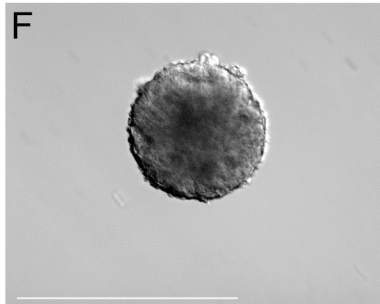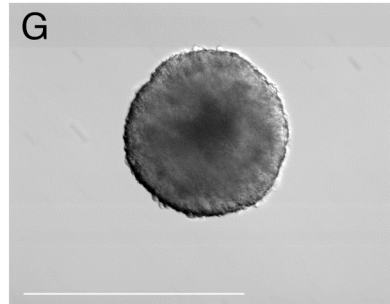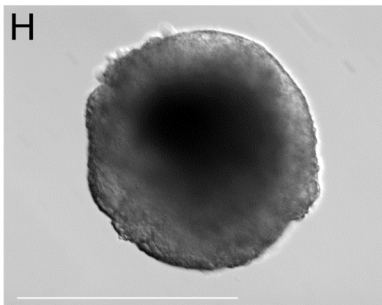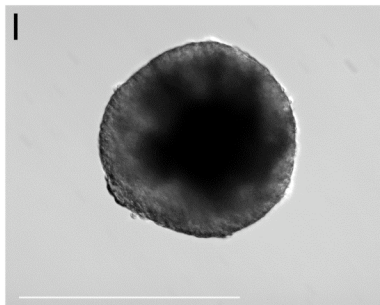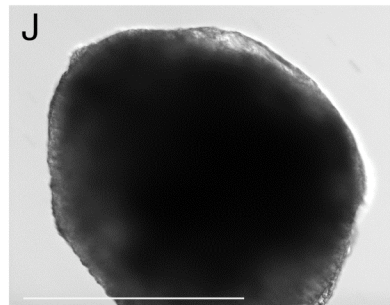

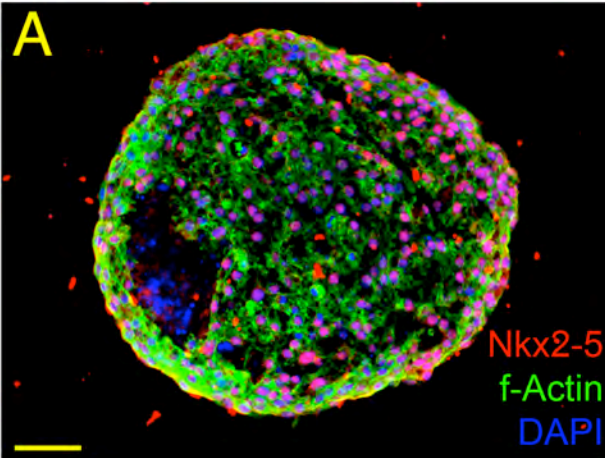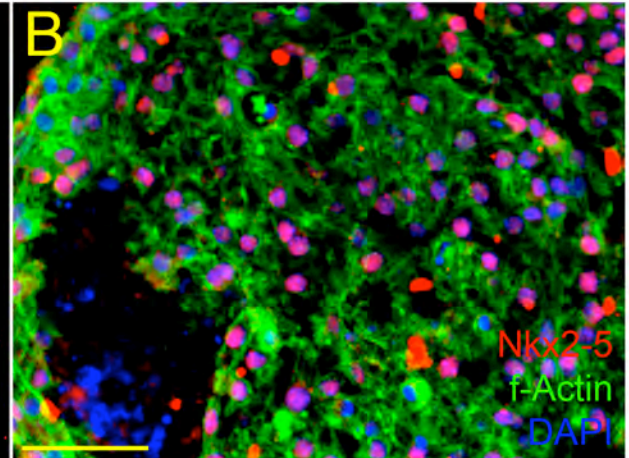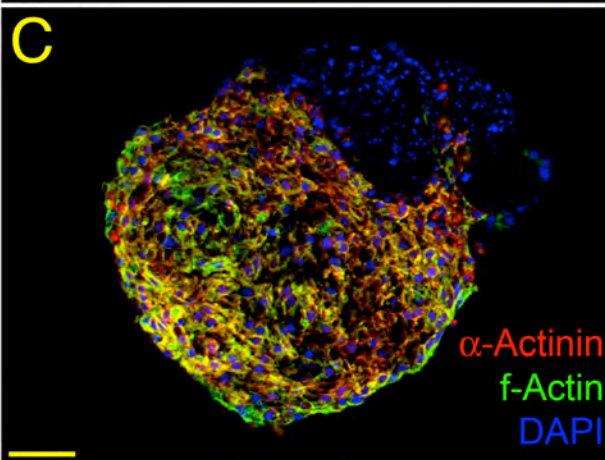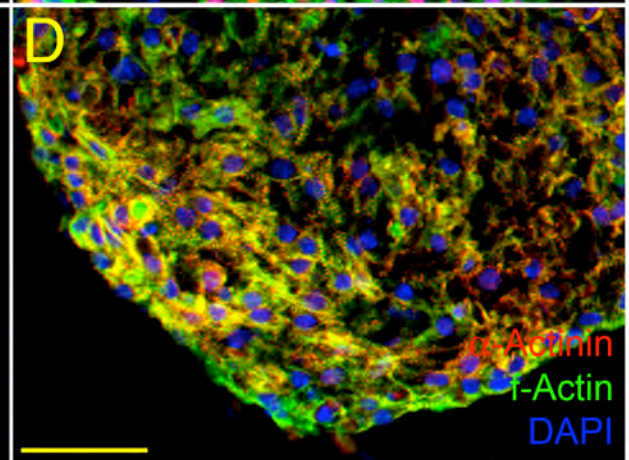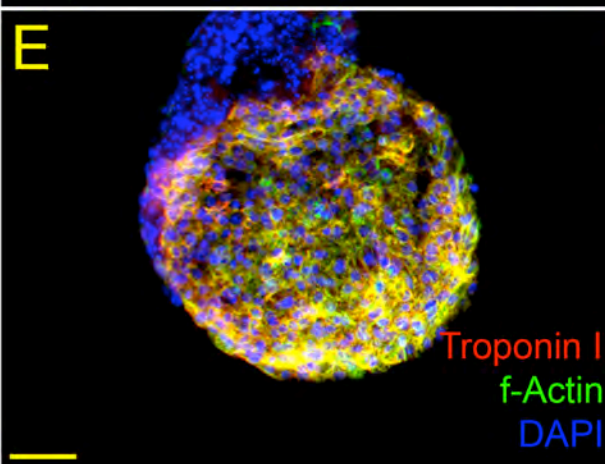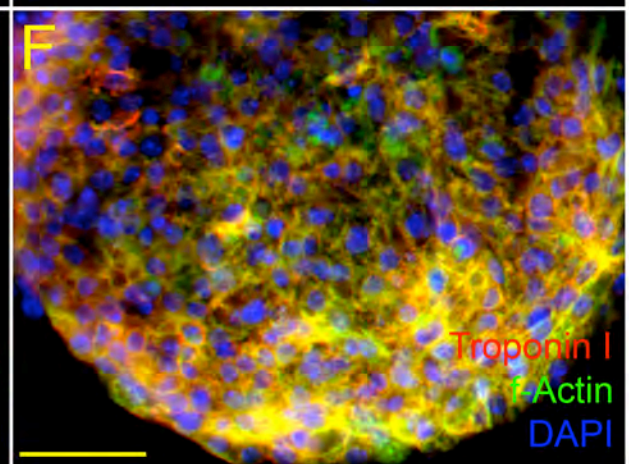



Serum free culture

10% FBS

Day 6+3

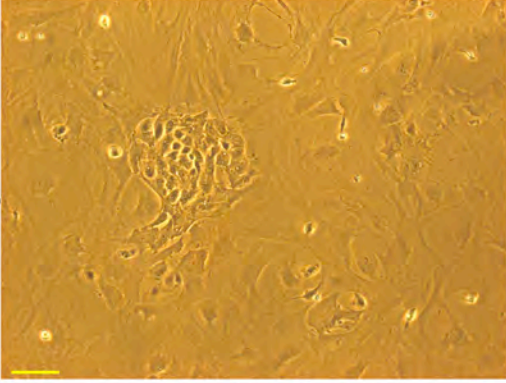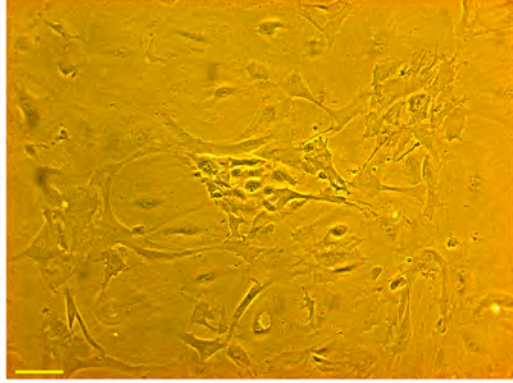

Day 6+7

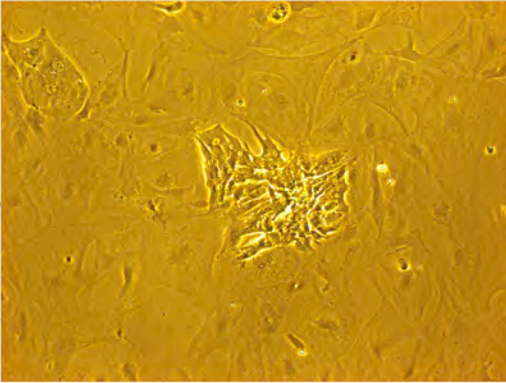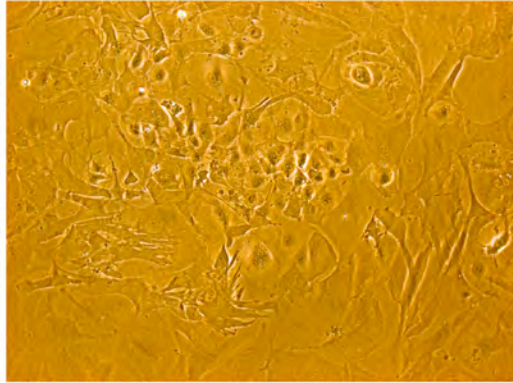

Day 6+11

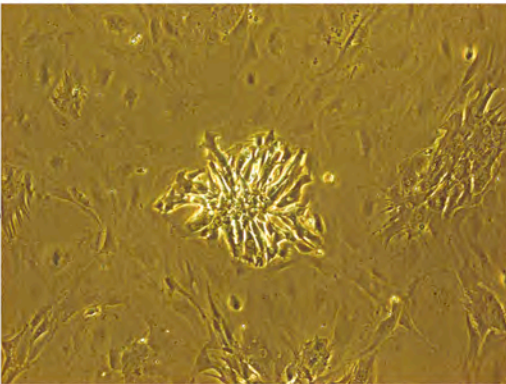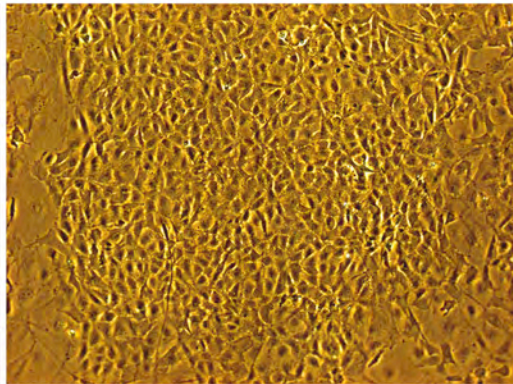

Day 6+14

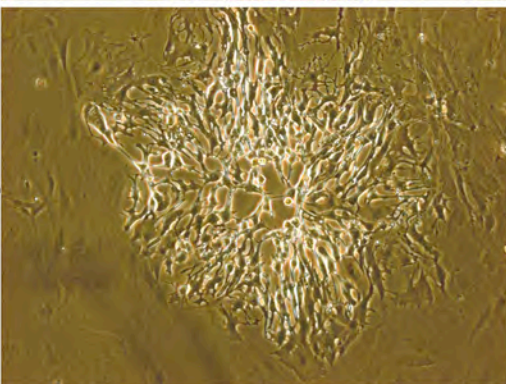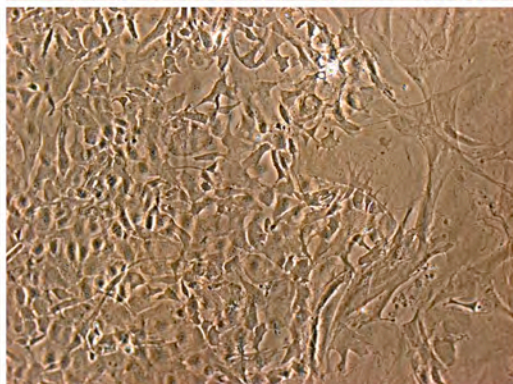

**Upregulated genes**

| UniGene ID | Gene Symbol     | Day 5 | Day 6 | Day 7 | Day 8 | UniGene ID | Gene Symbol    | Day 5 | Day 6 | Day 7 | Day 8 | UniGene ID | Gene Symbol     | Day 5 | Day 6 | Day 7 | Day 8 | UniGene ID | Gene Symbol | Day 5 | Day 6 | Day 7 | Day 8 |
|------------|-----------------|-------|-------|-------|-------|------------|----------------|-------|-------|-------|-------|------------|-----------------|-------|-------|-------|-------|------------|-------------|-------|-------|-------|-------|
|            |                 |       |       |       |       |            |                |       |       |       |       |            |                 |       |       |       |       |            |             |       |       |       |       |
| Mm.277376  | <b>Abca1</b>    | 1.91  | 2.64  | 2.28  | 1.58  | Mm.40228   | <b>Exoc3l</b>  | 2.17  | 2.17  | 2.78  | 4.08  | Mm.260768  | <b>Plvap</b>    | 3.21  | 3.02  | 4.12  | 6.12  |            |             |       |       |       |       |
| Mm.686     | <b>Actc1</b>    | 2.41  | 2.29  | 1.74  | 2.97  | Mm.271644  | <b>Fbn1</b>    | 3.03  | 1.88  | 2.91  | 5.63  | Mm.256712  | <b>Ptxnc1</b>   | 2.74  | 2.62  | 2.56  | 2.31  |            |             |       |       |       |       |
| Mm.37638   | <b>Actn2</b>    | 2.22  | 2.93  | 2.76  | 3.77  | Mm.295740  | <b>Fgd5</b>    | 2.03  | 2.70  | 2.68  | 3.15  | Mm.3085    | <b>Ptxnc1</b>   | 2.57  | 2.51  | 2.46  | 3.72  |            |             |       |       |       |       |
| Mm.24005   | <b>Amigo2</b>   | 1.57  | 2.31  | 2.06  | 2.68  | Mm.258908  | <b>Flil1</b>   | 2.13  | 1.51  | 2.07  | 1.91  | Mm.259072  | <b>Pparg1a</b>  | 1.59  | 1.59  | 2.05  | 1.77  |            |             |       |       |       |       |
| Mm.10279   | <b>Ankrd1</b>   | 1.52  | 1.58  | 1.86  | 2.56  | Mm.3464    | <b>Flt1</b>    | 2.09  | 2.86  | 3.11  | 5.81  | Mm.308126  | <b>Ppp1r14c</b> | 1.91  | 2.04  | 2.71  | 2.35  |            |             |       |       |       |       |
| Mm.196330  | <b>Ankrd47</b>  | 1.55  | 1.68  | 2.01  | 2.43  | Mm.3291    | <b>Flt4</b>    | 2.10  | 2.37  | 2.25  | 3.47  | Mm.3243    | <b>Procr</b>    | 1.77  | 2.35  | 3.06  | 4.34  |            |             |       |       |       |       |
| Mm.146736  | <b>Ap1s2</b>    | 1.89  | 2.39  | 1.78  | 2.00  | Mm.976     | <b>Fmo1</b>    | 1.99  | 2.05  | 2.40  | 2.80  | Mm.37213   | <b>Ptprb</b>    | 2.45  | 3.67  | 5.02  | 7.36  |            |             |       |       |       |       |
| Mm.26743   | <b>Apoa1</b>    | 1.53  | 3.26  | 10.43 | 15.46 | Mm.1870    | <b>Fmyd5</b>   | 1.96  | 1.64  | 1.52  | 2.39  | Mm.311809  | <b>Ptprm</b>    | 2.28  | 2.67  | 3.62  | 5.14  |            |             |       |       |       |       |
| Mm.221239  | <b>Apob</b>     | 3.10  | 2.69  | 11.21 | 14.69 | Mm.323322  | <b>Gaintl4</b> | 1.99  | 1.56  | 1.79  | 2.46  | Mm.262294  | <b>Qk</b>       | 1.66  | 2.24  | 2.03  | 1.52  |            |             |       |       |       |       |
| Mm.2161    | <b>Apom</b>     | 1.60  | 3.74  | 10.24 | 11.60 | Mm.1222    | <b>Gap43</b>   | 2.12  | 2.93  | 3.45  | 4.39  | Mm.358667  | <b>Ramp2</b>    | 2.25  | 2.91  | 3.60  | 3.80  |            |             |       |       |       |       |
| Mm.361895  | <b>Arhgef15</b> | 2.03  | 2.47  | 2.52  | 4.74  | Mm.252599  | <b>Gimap1</b>  | 2.24  | 2.70  | 2.21  | 3.01  | Mm.384029  | <b>Rappgef3</b> | 1.97  | 2.52  | 2.59  | 7.82  |            |             |       |       |       |       |
| Mm.104900  | <b>Asah2</b>    | 1.55  | 1.91  | 1.90  | 1.74  | Mm.333048  | <b>Gimap4</b>  | 2.55  | 3.56  | 4.78  | 9.37  | Mm.227642  | <b>Rappgef5</b> | 1.95  | 2.39  | 2.58  | 3.97  |            |             |       |       |       |       |
| Mm.45019   | <b>Asah31</b>   | 2.20  | 3.30  | 4.14  | 7.96  | Mm.321047  | <b>Gimap6</b>  | 1.60  | 1.90  | 3.35  | 4.03  | Mm.329203  | <b>Rasgrp3</b>  | 1.99  | 3.20  | 3.33  | 3.41  |            |             |       |       |       |       |
| Mm.27159   | <b>Asb2</b>     | 3.00  | 3.42  | 2.76  | 2.71  | Mm.86514   | <b>Gimap8</b>  | 2.66  | 3.24  | 3.38  | 4.63  | Mm.181396  | <b>Rasip1</b>   | 2.81  | 3.04  | 2.87  | 4.84  |            |             |       |       |       |       |
| Mm.4550    | <b>At1p1b1</b>  | 1.50  | 2.04  | 3.29  | 2.67  | Mm.24615   | <b>Gja4</b>    | 2.61  | 2.90  | 4.22  | 6.49  | Mm.248291  | <b>Rassf5</b>   | 2.70  | 1.86  | 1.93  | 2.54  |            |             |       |       |       |       |
| Mm.227583  | <b>Atp2a2</b>   | 1.97  | 1.51  | 1.79  | 1.92  | Mm.46299   | <b>Gngt2</b>   | 1.85  | 1.60  | 1.98  | 2.46  | Mm.286753  | <b>Rgs3</b>     | 1.60  | 2.08  | 2.77  | 4.46  |            |             |       |       |       |       |
| Mm.254297  | <b>Atp7a</b>    | 1.64  | 1.57  | 1.86  | 1.60  | Mm.222320  | <b>Gpm6b</b>   | 1.85  | 2.66  | 2.56  | 2.20  | Mm.27467   | <b>Rhoj</b>     | 2.83  | 2.61  | 1.97  | 2.07  |            |             |       |       |       |       |
| Mm.34379   | <b>BC054438</b> | 1.61  | 2.28  | 2.69  | 6.77  | Mm.23478   | <b>Gpr116</b>  | 2.14  | 2.84  | 4.23  | 6.11  | Mm.45980   | <b>Rnf125</b>   | 1.79  | 2.10  | 1.91  | 1.69  |            |             |       |       |       |       |
| Mm.12930   | <b>Bcl6b</b>    | 2.61  | 2.28  | 2.78  | 4.14  | Mm.390261  | <b>Gpr126</b>  | 1.98  | 3.02  | 3.74  | 6.08  | Mm.45191   | <b>Rsps3</b>    | 1.62  | 1.70  | 2.11  | 6.64  |            |             |       |       |       |       |
| Mm.681     | <b>C1qr1</b>    | 4.04  | 3.99  | 4.39  | 8.93  | Mm.6375    | <b>Gyg1</b>    | 1.90  | 1.54  | 1.71  | 3.14  | Mm.239871  | <b>Ryr2</b>     | 2.23  | 1.80  | 2.76  | 2.93  |            |             |       |       |       |       |
| Mm.75467   | <b>Calcr1</b>   | 2.50  | 4.05  | 5.66  | 7.10  | Mm.266790  | <b>Hapin1</b>  | 3.61  | 2.11  | 3.19  | 3.11  | Mm.331185  | <b>S100a16</b>  | 1.83  | 2.10  | 3.25  | 2.28  |            |             |       |       |       |       |
| Mm.44529   | <b>Cap2</b>     | 1.81  | 2.14  | 1.83  | 1.67  | Mm.235342  | <b>Hecw2</b>   | 1.68  | 2.35  | 1.78  | 2.80  | Mm.274399  | <b>Sept8</b>    | 1.53  | 1.69  | 1.59  | 1.76  |            |             |       |       |       |       |
| Mm.119320  | <b>Car8</b>     | 2.98  | 3.63  | 4.43  | 7.89  | Mm.277092  | <b>Heph</b>    | 2.16  | 2.29  | 2.07  | 3.12  | Mm.2044    | <b>Serpinf1</b> | 2.56  | 1.59  | 1.66  | 1.74  |            |             |       |       |       |       |
| Mm.28278   | <b>Cav1</b>     | 1.78  | 2.75  | 3.34  | 8.48  | Mm.181852  | <b>Hod</b>     | 1.70  | 1.51  | 2.04  | 1.52  | Mm.146855  | <b>Shank3</b>   | 2.26  | 2.19  | 2.86  | 4.12  |            |             |       |       |       |       |
| Mm.31915   | <b>Cav2</b>     | 1.92  | 2.43  | 4.26  | 8.13  | Mm.275683  | <b>Ica1</b>    | 1.56  | 1.68  | 1.82  | 2.82  | Mm.225     | <b>She</b>      | 2.60  | 3.38  | 4.42  | 5.96  |            |             |       |       |       |       |
| Mm.2619    | <b>Cck</b>      | 2.26  | 2.63  | 4.83  | 4.46  | Mm.90364   | <b>Icam1</b>   | 1.72  | 1.61  | 1.55  | 2.36  | Mm.296453  | <b>Slat7c</b>   | 2.28  | 1.63  | 1.99  | 2.17  |            |             |       |       |       |       |
| Mm.32955   | <b>Cd109</b>    | 1.62  | 2.41  | 3.55  | 3.25  | Mm.394     | <b>Icam2</b>   | 3.85  | 3.74  | 5.05  | 8.30  | Mm.268797  | <b>Sic18a2</b>  | 2.85  | 1.98  | 1.72  | 1.79  |            |             |       |       |       |       |
| Mm.29798   | <b>Cd34</b>     | 3.03  | 1.85  | 1.98  | 3.66  | Mm.268521  | <b>Igf1</b>    | 2.33  | 2.60  | 2.28  | 2.56  | Mm.7444    | <b>Sic32a1</b>  | 2.06  | 1.82  | 2.32  | 2.71  |            |             |       |       |       |       |
| Mm.249873  | <b>Cd38</b>     | 1.54  | 1.62  | 1.58  | 1.54  | Mm.233799  | <b>Igfbp4</b>  | 2.28  | 1.69  | 2.26  | 5.79  | Mm.210815  | <b>Sorbs1</b>   | 1.62  | 2.36  | 2.27  | 1.69  |            |             |       |       |       |       |
| Mm.247265  | <b>Cd59a</b>    | 1.84  | 1.83  | 1.50  | 1.88  | Mm.2923    | <b>Il2rg</b>   | 2.29  | 2.59  | 1.68  | 1.88  | Mm.211096  | <b>Sorbs2</b>   | 2.37  | 2.06  | 2.56  | 3.10  |            |             |       |       |       |       |
| Mm.334648  | <b>Cd97</b>     | 2.08  | 2.60  | 2.23  | 2.78  | Mm.333496  | <b>Ilpr2</b>   | 1.58  | 1.82  | 2.06  | 2.20  | Mm.264904  | <b>Sox18</b>    | 2.31  | 3.13  | 3.68  | 5.07  |            |             |       |       |       |       |
| Mm.307488  | <b>Cdc42ep1</b> | 1.87  | 1.60  | 1.66  | 3.27  | Mm.282386  | <b>Kcnc3</b>   | 1.88  | 2.89  | 6.12  | 7.17  | Mm.42162   | <b>Sox7</b>     | 2.84  | 3.97  | 5.18  | 9.98  |            |             |       |       |       |       |
| Mm.268397  | <b>Cdgap</b>    | 1.97  | 1.88  | 1.69  | 1.60  | Mm.378947  | <b>Kdr</b>     | 1.97  | 2.17  | 2.59  | 1.94  | Mm.123110  | <b>Spnb2</b>    | 1.52  | 1.58  | 1.67  | 1.57  |            |             |       |       |       |       |
| Mm.21767   | <b>Cdn5</b>     | 3.72  | 3.57  | 4.59  | 7.73  | Mm.26938   | <b>Klf2</b>    | 1.88  | 2.52  | 2.30  | 2.02  | Mm.260838  | <b>Siat7a1</b>  | 2.27  | 2.32  | 2.12  | 1.61  |            |             |       |       |       |       |
| Mm.247642  | <b>Centd3</b>   | 1.75  | 2.09  | 3.59  | 3.51  | Mm.132583  | <b>Klf4</b>    | 1.94  | 4.14  | 9.77  | 14.42 | Mm.220821  | <b>Stab1</b>    | 2.05  | 2.81  | 3.72  | 2.22  |            |             |       |       |       |       |
| Mm.22768   | <b>Cldn5</b>    | 2.57  | 2.46  | 2.34  | 3.78  | Mm.25785   | <b>Ldb2</b>    | 1.60  | 3.22  | 2.79  | 2.82  | Mm.111904  | <b>Stk23</b>    | 2.31  | 1.89  | 2.51  | 2.15  |            |             |       |       |       |       |
| Mm.280563  | <b>Clec14a</b>  | 2.12  | 2.10  | 2.14  | 6.78  | Mm.29733   | <b>Ldb3</b>    | 3.48  | 2.76  | 3.33  | 5.78  | Mm.35789   | <b>Synpo2l</b>  | 2.63  | 3.08  | 4.19  | 4.47  |            |             |       |       |       |       |
| Mm.295205  | <b>Cmya4</b>    | 2.08  | 2.57  | 3.18  | 3.79  | Mm.17185   | <b>Lgmn</b>    | 1.66  | 2.52  | 4.75  | 2.70  | Mm.14313   | <b>Tek</b>      | 3.15  | 2.72  | 2.79  | 3.79  |            |             |       |       |       |       |
| Mm.4352    | <b>Col18a1</b>  | 1.76  | 1.82  | 2.10  | 1.83  | Mm.206759  | <b>Lrp11</b>   | 1.93  | 2.87  | 2.67  | 3.33  | Mm.124316  | <b>Tfpi</b>     | 2.04  | 1.95  | 2.08  | 1.88  |            |             |       |       |       |       |
| Mm.738     | <b>Col4a1</b>   | 1.69  | 2.37  | 3.19  | 3.68  | Mm.149235  | <b>Mfn</b>     | 1.82  | 2.33  | 1.87  | 2.83  | Mm.172346  | <b>Tgfbr2</b>   | 1.60  | 1.77  | 2.83  | 2.77  |            |             |       |       |       |       |
| Mm.169929  | <b>Creb3l2</b>  | 2.23  | 1.51  | 2.15  | 4.15  | Mm.2019    | <b>Mirc1</b>   | 1.63  | 2.07  | 4.69  | 3.84  | Mm.330731  | <b>Tgm2</b>     | 1.66  | 1.57  | 1.81  | 1.98  |            |             |       |       |       |       |
| Mm.2277    | <b>Ctsh</b>     | 1.55  | 2.90  | 8.00  | 9.75  | Mm.2941    | <b>Mittp</b>   | 1.54  | 1.89  | 5.68  | 5.81  | Mm.24096   | <b>Thbd</b>     | 1.88  | 2.39  | 2.82  | 3.17  |            |             |       |       |       |       |
| Mm.313915  | <b>Cubn</b>     | 1.87  | 1.72  | 2.91  | 4.82  | Mm.149438  | <b>Mtus1</b>   | 1.51  | 2.82  | 2.09  | 2.42  | Mm.32067   | <b>Thsd11</b>   | 2.76  | 2.03  | 2.26  | 3.22  |            |             |       |       |       |       |
| Mm.240830  | <b>Dab2</b>     | 1.58  | 2.71  | 4.17  | 3.29  | Mm.10728   | <b>Mybpc3</b>  | 2.73  | 2.45  | 3.67  | 4.88  | Mm.124100  | <b>Tiam1</b>    | 1.89  | 2.26  | 2.14  | 3.17  |            |             |       |       |       |       |
| Mm.62982   | <b>Dcblid1</b>  | 1.52  | 1.58  | 2.70  | 4.04  | Mm.290003  | <b>Myh6</b>    | 3.83  | 3.28  | 4.24  | 6.24  | Mm.4345    | <b>Tie1</b>     | 3.25  | 2.39  | 2.79  | 4.00  |            |             |       |       |       |       |
| Mm.29362   | <b>Diras2</b>   | 1.95  | 4.28  | 6.63  | 10.16 | Mm.319176  | <b>Myh7</b>    | 3.29  | 4.05  | 5.16  | 6.71  | Mm.212428  | <b>Tmem100</b>  | 1.61  | 2.53  | 5.12  | 7.44  |            |             |       |       |       |       |
| Mm.1151    | <b>Dpp4</b>     | 1.94  | 4.27  | 10.14 | 14.14 | Mm.1529    | <b>Myi2</b>    | 3.22  | 5.46  | 7.02  | 9.51  | Mm.329776  | <b>Tmem2</b>    | 1.69  | 2.11  | 1.99  | 2.88  |            |             |       |       |       |       |
| Mm.4729    | <b>Dusp2</b>    | 1.77  | 1.75  | 1.72  | 3.55  | Mm.7353    | <b>Myi3</b>    | 2.49  | 2.63  | 3.43  | 3.91  | Mm.255332  | <b>Tnfrap2</b>  | 2.26  | 1.87  | 2.22  | 3.50  |            |             |       |       |       |       |
| Mm.220982  | <b>Dysf</b>     | 2.29  | 2.46  | 2.42  | 3.62  | Mm.247636  | <b>Myi4</b>    | 2.20  | 2.45  | 2.60  | 3.25  | Mm.712     | <b>Tnnc1</b>    | 1.88  | 2.37  | 3.04  | 4.24  |            |             |       |       |       |       |
| Mm.215971  | <b>Ebf1</b>     | 1.65  | 2.08  | 2.24  | 2.18  | Mm.46514   | <b>Myi7</b>    | 2.09  | 2.02  | 2.32  | 3.63  | Mm.247470  | <b>Tnnt2</b>    | 2.57  | 3.69  | 3.70  | 3.38  |            |             |       |       |       |       |
| Mm.125580  | <b>Edi13</b>    | 2.46  | 2.02  | 2.29  | 3.63  | Mm.261329  | <b>Myc2b</b>   | 1.58  | 2.54  | 2.46  | 2.01  | Mm.274159  | <b>Tspan18</b>  | 1.80  | 1.78  | 1.67  | 1.64  |            |             |       |       |       |       |
| Mm.229532  | <b>Ednrbb</b>   | 1.76  | 1.73  | 1.92  | 1.81  | Mm.32257   | <b>Myocd</b>   | 2.38  | 2.25  | 3.03  | 4.15  | Mm.373672  | <b>Ttn</b>      | 4.07  | 3.61  | 6.02  | 8.78  |            |             |       |       |       |       |
| Mm.268933  | <b>Egfr7</b>    | 1.76  | 1.87  | 1.51  | 3.20  | Mm.120298  | <b>Nebl</b>    | 2.55  | 2.60  | 2.91  | 4.69  | Mm.2108    | <b>Trt</b>      | 1.54  | 3.74  | 5.61  | 6.48  |            |             |       |       |       |       |
| Mm.4454    | <b>Elk3</b>     | 2.50  | 2.73  | 2.17  | 2.24  | Mm.329560  | <b>Nfatc1</b>  | 2.05  | 1.82  | 2.38  | 3.37  | Mm.34874   | <b>Ushbp1</b>   | 1.96  | 1.93  | 2.87  | 5.56  |            |             |       |       |       |       |
| Mm.317261  | <b>Eltf1</b>    | 3.01  | 2.51  | 2.88  | 7.07  | Mm.57043   | <b>Nfkbe1</b>  | 1.55  | 1.60  | 1.51  | 2.06  | Mm.46628   | <b>Veze1</b>    | 2.13  | 1.84  | 2.87  | 3.83  |            |             |       |       |       |       |
| Mm.27343   | <b>Emcn</b>     | 1.99  | 2.14  | 3.68  | 6.27  | Mm.4691    | <b>Nid1</b>    | 1.82  | 2.30  | 2.16  | 1.58  | Mm.3929    | <b>Zfx1a</b>    | 1.67  | 1.67  | 2.21  | 1.68  |            |             |       |       |       |       |
| Mm.286375  | <b>Emilin1</b>  | 2.23  | 1.59  | 1.64  | 1.86  | Mm.41974   | <b>Nkx2-5</b>  | 1.90  | 1.67  | 2.33  | 3.42  | Mm.331840  | <b>Zfp69</b>    | 1.66  | 2.00  | 2.37  | 4.44  |            |             |       |       |       |       |
| Mm.241073  | <b>Enc1</b>     | 1.88  | 1.55  | 1.59  | 1.94  | Mm.258415  | <b>Nos3</b>    | 2.40  | 3.70  | 4.41  | 6.47  | Mm.331088  | 111003pE23Rik   | 2.45  | 2.20  | 2.68  | 4.07  |            |             |       |       |       |       |
| Mm.225297  | <b>Eng</b>      | 2.39  | 2.16  | 2.36  | 2.77  | Mm.290610  | <b>Notch1</b>  | 2.29  | 2.52  | 3.01  | 3.70  | Mm.23932   | 3110004L20Rik   | 1.54  | 1.69  | 2.30  | 3.33  |            |             |       |       |       |       |
| Mm.164531  | <b>Erg</b>      | 3.00  | 3.23  | 3.91  | 6.41  | Mm.24887   | <b>Npl</b>     | 2.31  | 2.52  | 2.32  | 1.52  | Mm.318710  | 3632451O06Rik   | 1.78  | 2.18  | 2.78  | 2.12  |            |             |       |       |       |       |
| Mm.41751   | <b>Esam1</b>    | 3.24  | 3.05  | 3.58  | 3.40  | Mm.12862   | <b>Pcdh12</b>  | 2.71  | 3.60  | 4.29  | 7.31  | Mm.68617   | 4631423F02Rik   | 1.84  | 1.75  | 2.02  | 2.52  |            |             |       |       |       |       |
| Mm.89989   | <b>Esrng</b>    | 1.59  | 2.20  | 2.66  | 3.21  | Mm.348053  | <b>Pcdhb21</b> | 1.99  | 2.01  | 1.62  | 1.89  | Mm.334569  | 4732435N03Rik   | 1.69  | 2.04  | 1.75  | 1.73  |            |             |       |       |       |       |
| Mm.292415  | <b>Ets1</b>     | 2.43  | 1.83  | 1.57  | 2.67  | Mm.247564  | <b>Pde2a</b>   | 1.59  | 2.14  |       |       |            |                 |       |       |       |       |            |             |       |       |       |       |

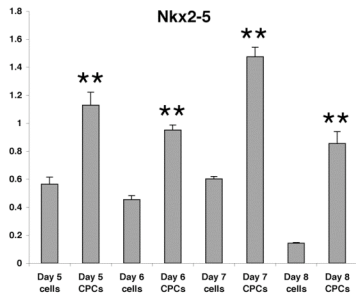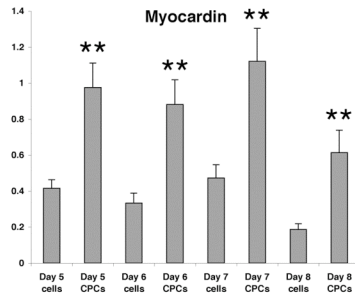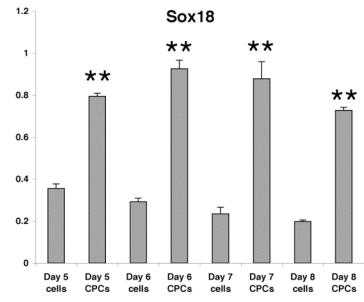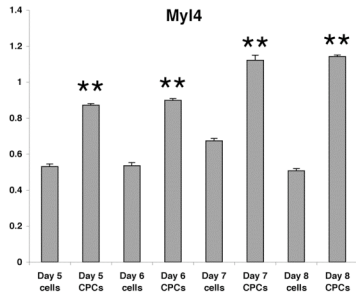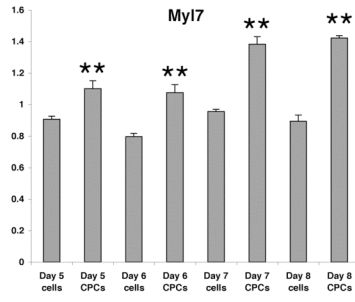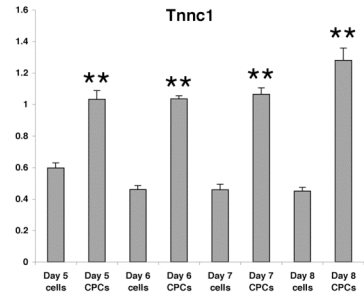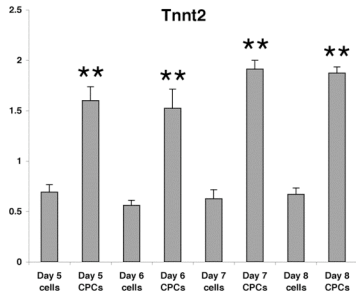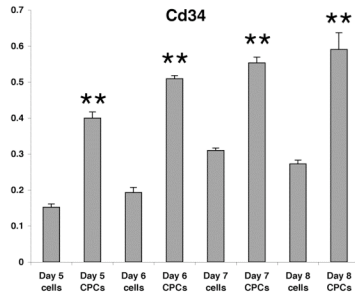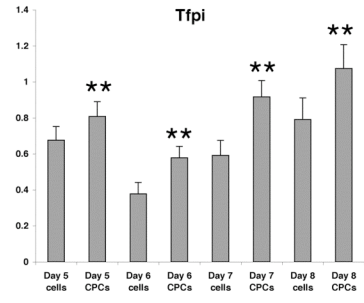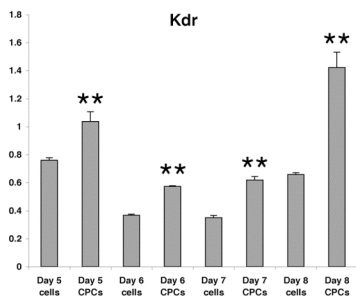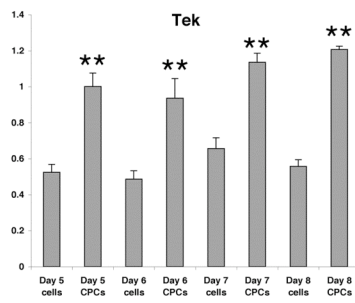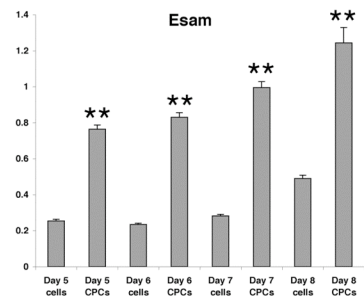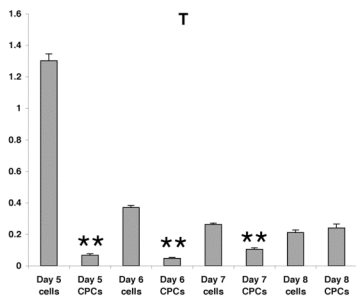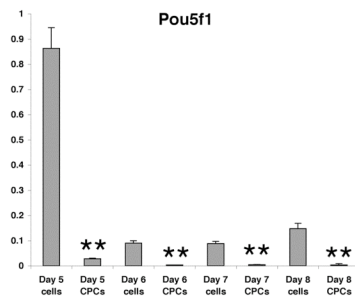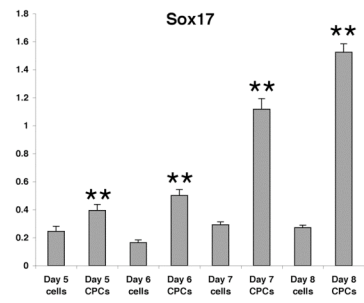

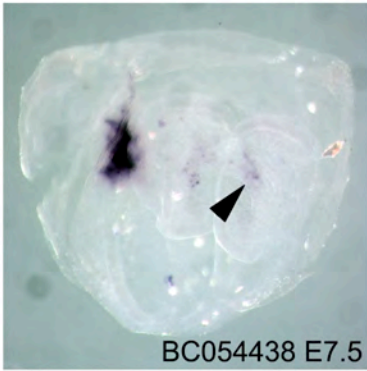

BC054438 E7.5

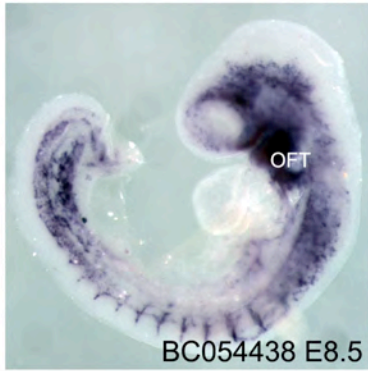

BC054438 E8.5

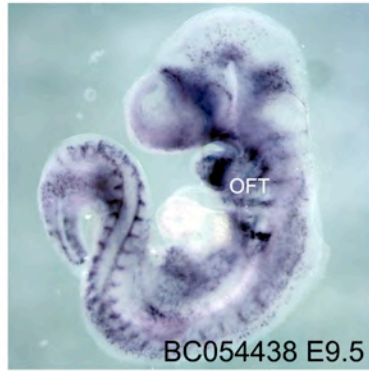

BC054438 E9.5

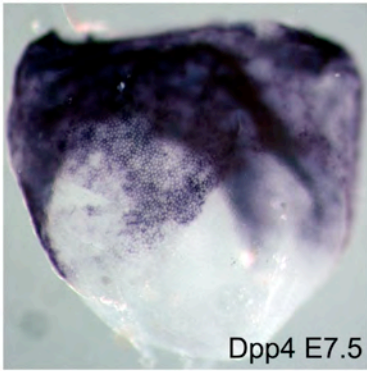

Dpp4 E7.5

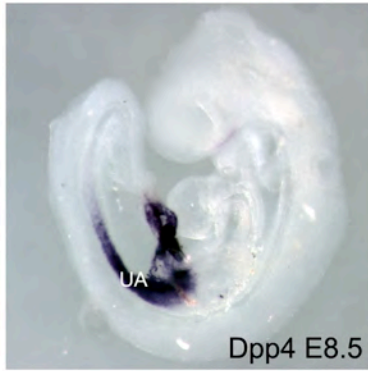

Dpp4 E8.5

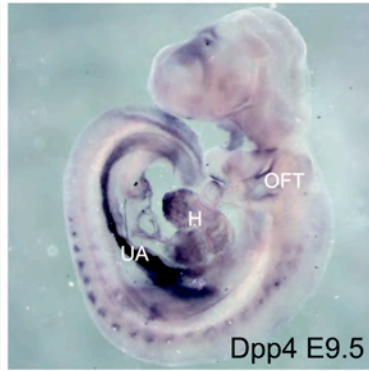

Dpp4 E9.5

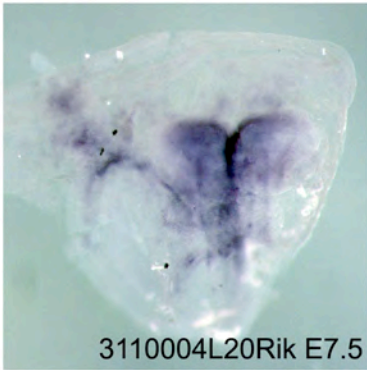

3110004L20Rik E7.5

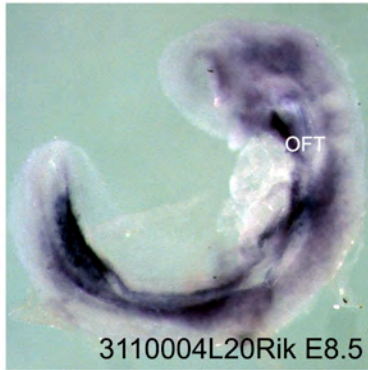

3110004L20Rik E8.5

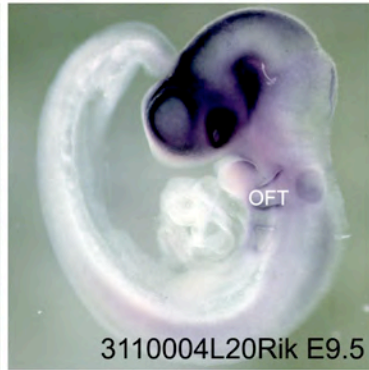

3110004L20Rik E9.5
